# Supplementary material for: Zirconium–cyanuric acid coordination polymer: highly efficient catalyst for conversion of levulinic acid to γ-valerolactone
Source: Royal Society of Chemistry journal article supplement (doi:10.1039/c5cy02215k), 2016-01-01
Supplement: c5cy02215k1.pdf [file c5cy02215k1.pdf]

## Electronic Supplementary Information

### Zirconium-cyanuric acid coordination polymer: Highly efficient catalyst for conversion of levulinic acid to $\gamma$ -valerolactone

Zhimin Xue,<sup>a\*</sup> Jingyun Jiang,<sup>b</sup> Guofeng Li,<sup>b</sup> Wancheng Zhao,<sup>b</sup> Jinfang Wang<sup>b</sup> and Tiancheng Mu<sup>b\*</sup>

<sup>a</sup>Beijing Key Laboratory of Lignocellulosic Chemistry, College of Materials Science and Technology, Beijing Forestry University, Beijing 100083, China. E-mail: [zmxue@bjfu.edu.cn](mailto:zmxue@bjfu.edu.cn).

<sup>b</sup>Department of Chemistry, Renmin University of China, Beijing 100872, China. E-mail: [tcmu@ruc.edu.cn](mailto:tcmu@ruc.edu.cn); [tcmu@chem.ruc.edu.cn](mailto:tcmu@chem.ruc.edu.cn).

### **Catalyst characterization:**

The scanning electron microscopy (SEM) measurements were performed on a Hitachi S-4800 Scanning Electron Microscope operated at 15 kV.

The transmission electron microscopy (TEM) images were obtained using a TEM JeoL-1011 with an accelerating voltage of 120 kV.

X-ray diffraction (XRD) measurements were conducted on an X-ray diffractometer (D/MAX-RC, Japan) operated at 40 kV and 200 mA with Cu K $\alpha$  ( $\lambda=0.154$  nm) radiation.

N<sub>2</sub> adsorption-desorption isotherms were obtained using the Micromeritics ASAP 2020 V3.00 H (USA) surface area analyzer at 77 K at high vacuum.

The XPS measurements were carried out on an ESCAL Lab 220i-XL spectrometer at a pressure of  $\sim 3 \times 10^{-9}$  mbar (1 mbar=100 Pa) using Al K $\alpha$  as the excitation source ( $h\nu=1486.6$  eV) and operated at 15 kV and 20 mA. The binding energies were referenced to the C1s line at 284.8 eV from adventitious carbon.

The contents of Zr in Zr-CA and the concentration of Zr in the reaction solution were determined by ICP-AES (VISTA-MPX). The content of C and N in Zr-CA were obtained from elemental analysis by using the FLASH EA1112 analyzer.

FT-IR spectra were recorded on Bruker Tensor 27 IR spectrometer.

Temperature-programmed desorption of carbon dioxide (CO<sub>2</sub>-TPD) was performed on Micromeritics' AutoChem 2950 HP Chemisorption Analyzer. In the experiment, the catalyst was charged into the quartz reactor, and the temperature was increased from room temperature to 150 °C at a rate of 10 °C/min under a flow of He (50 cm<sup>3</sup>/min), and then the catalyst was kept at 150 °C for 4 h. After that, the temperature was decreased to 60 °C. CO<sub>2</sub> (50 cm<sup>3</sup>/min) was pulsed into the reactor at 60 °C under a flow of He (10 cm<sup>3</sup>/min) until the basic sites were saturated with CO<sub>2</sub>. The adsorbed CO<sub>2</sub> was removed by a flow of He (50 cm<sup>3</sup>/min). When the baseline was stable, the temperature was increased from 60 °C to 500 °C at a rate of 10 °C/min.

Temperature-programmed desorption of ammonia (NH<sub>3</sub>-TPD) was performed on Micromeritics' AutoChem 2950 HP Chemisorption Analyzer. The catalysts were charged into the quartz reactor, and the temperature was increased from room temperature to 150 °C at a rate of 10 °C/min under a flow of He (50 cm<sup>3</sup>/min), and then the catalyst was kept at 150 °C for 4 h. After that, the temperature was decreased to 60 °C. NH<sub>3</sub>/He (10/90, 50 cm<sup>3</sup>/min) was pulsed

into the reactor at 60 °C under a flow of He (10 cm<sup>3</sup>/min) until the acid sites were saturated with NH<sub>3</sub>. The adsorbed NH<sub>3</sub> was removed by a flow of He (50 cm<sup>3</sup>/min). When the baseline was stable, the temperature was increased from 60 °C to 500 °C at a rate of 10 °C/min.

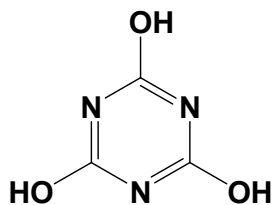

**Scheme S1.** The structure of cyanuric acid.

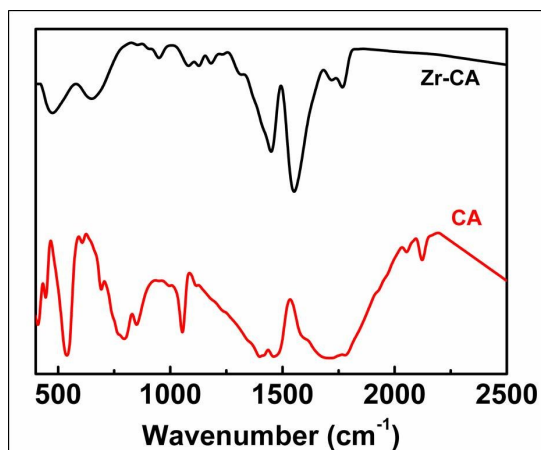

**Figure S1.** The FT-IR spectra of Zr-CA and CA.

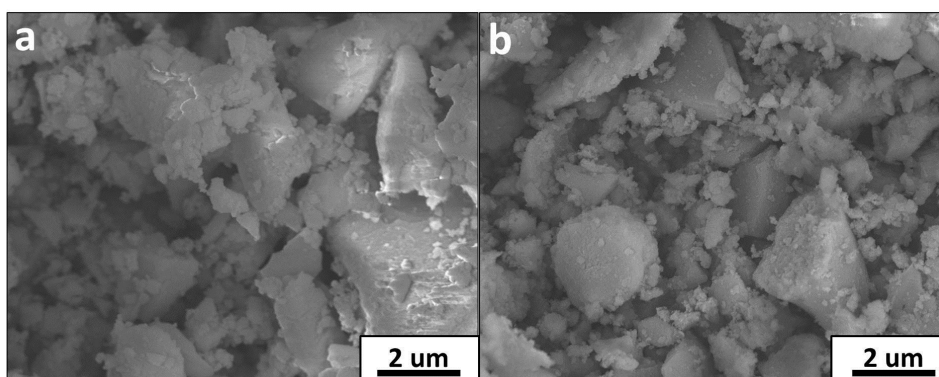

**Figure S2.** SEM images of other metal-CA catalysts. Zn-CA (a) and Sn-CA (b).

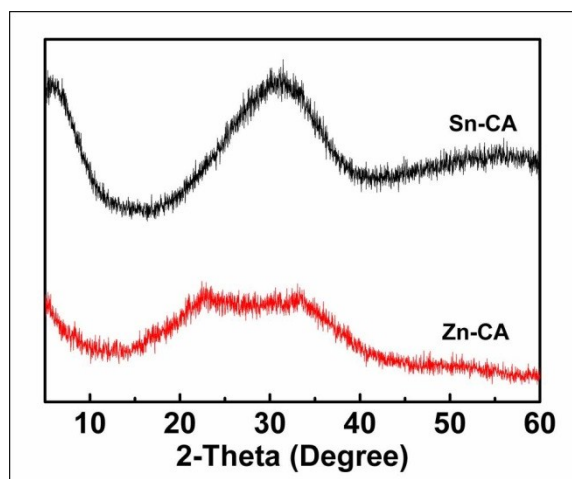

**Figure S3.** XRD patterns of other metal-CA catalysts. These XRD patterns indicated that the metal-CA catalysts prepared were poorly ordered and amorphous. At the same time, their crystallinity was very low.

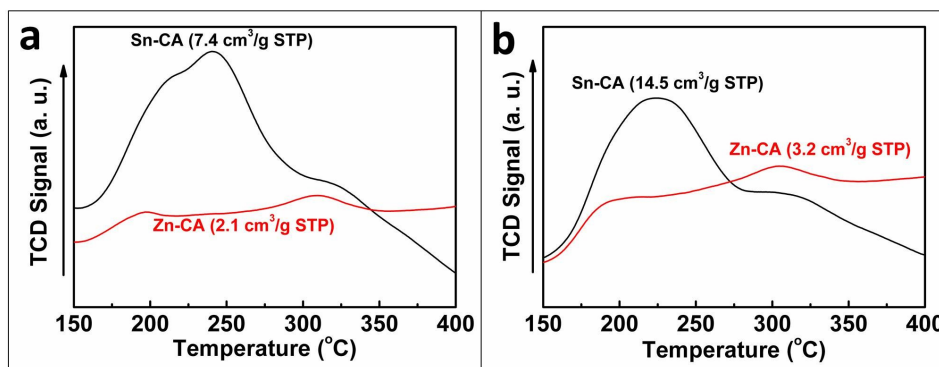

**Figure S4.**  $\text{NH}_3$ -TPD (a) and  $\text{CO}_2$ -TPD (b) examinations for Sn-CA and Zn-CA.

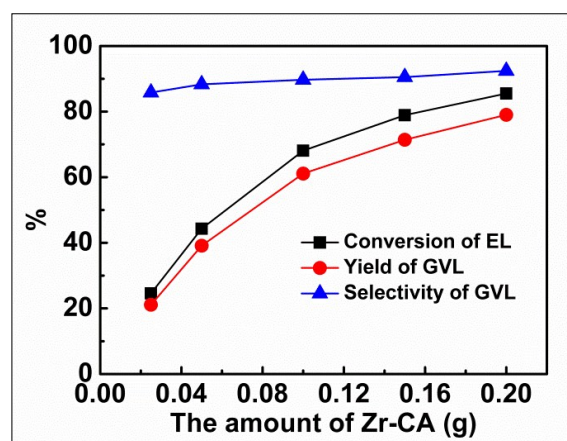

**Figure S5.** The influence of the Zr-CA amount on the TH reaction. Reaction conditions: EL, 1 mmol; isopropanol, 6 g; reaction time, 4 h; reaction temperature, 130 °C; a stainless reactor of 15 mL.

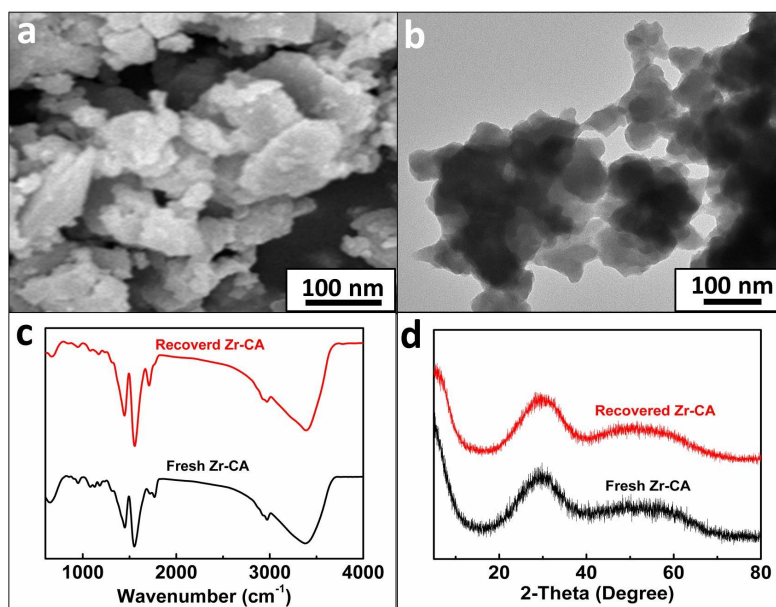

**Figure S6.** The characterization of the Zr-CA after reused for five times. SEM image (a), TEM image (b), FT-IR spectrum (c), and XRD pattern (d).

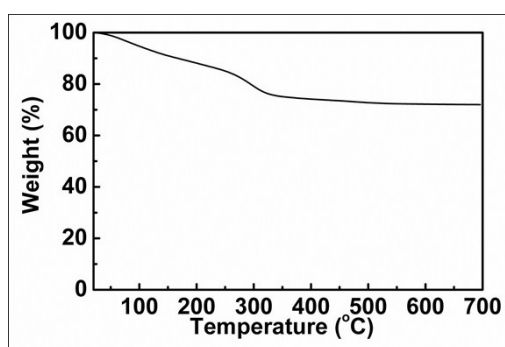

**Figure S7.** Thermogram of the prepared Zr-CA.

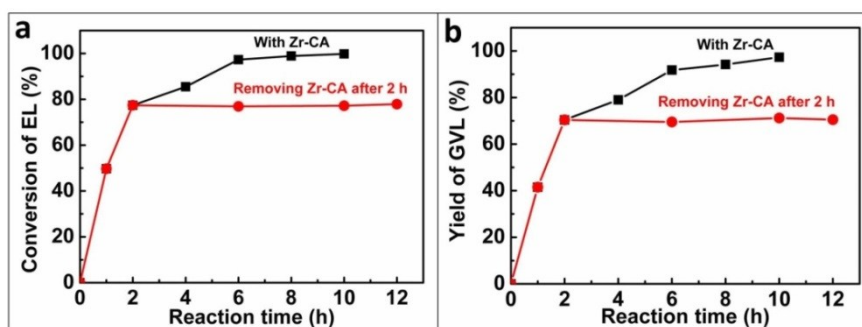

**Figure S8.** Time-conversion (a) and time-yield (b) plots for transfer hydrogenation reaction of EL with Zr-CA (Black line) or removing Zr-CA after 2 h (Red line). Reaction conditions: EL 1 mmol; isopropanol 6 g; Zr-CA 0.2 g; reaction time 10 h; reaction temperature, 130 °C.

**Table S1.** Properties of other metal (Zr, Sn, Zn)-CA catalysts.

| Entry          | Sample <sup>a</sup> | BET surface area (m <sup>2</sup> /g) <sup>b</sup> | Pore volume (cm <sup>3</sup> /g) <sup>c</sup> | Pore diameter (nm) <sup>d</sup> |
|----------------|---------------------|---------------------------------------------------|-----------------------------------------------|---------------------------------|
| 1              | Zr-CA               | 108                                               | 0.13                                          | 3.5                             |
| 2              | Sn-CA               | 104                                               | 0.14                                          | 3.2                             |
| 3              | Zn-CA               | 125                                               | 0.11                                          | 3.0                             |
| 4 <sup>e</sup> | Zr-CA               | 102                                               | 0.11                                          | 2.8                             |
| 5              | ZrO <sub>2</sub>    | 21                                                | 0.01                                          | 0.53                            |

<sup>a</sup>The samples were degassed at 120 °C for 24 h. <sup>b</sup>Surface area based on multipoint BET method. <sup>c</sup>Pore volume based on BJH method. <sup>d</sup>Pore diameter based on BJH method. <sup>e</sup>The Zr-CA was the recovered one after reused for five times.

**Table S2.** The influence of the isopropanol/EL mole ratio on the TH of EL to GVL.<sup>a</sup>

| Entry | Isopropanol/EL mole ratio | Conversion of EL (%) <sup>b</sup> | Yield of GVL (%) <sup>b</sup> | Selectivity of GVL (%) <sup>c</sup> |
|-------|---------------------------|-----------------------------------|-------------------------------|-------------------------------------|
| 1     | 1:1                       | 38.3                              | 21.8                          | 56.9                                |
| 2     | 1:5                       | 66.4                              | 46.9                          | 70.6                                |
| 3     | 1:10                      | 80                                | 61.8                          | 77.3                                |
| 4     | 1:17                      | 86.7                              | 72.3                          | 83.4                                |
| 5     | 1:33                      | 88.5                              | 77.7                          | 87.8                                |
| 6     | 1:67                      | 89.6                              | 81.8                          | 91.2                                |
| 7     | 1:100                     | 89.3                              | 82.1                          | 91.9                                |

<sup>a</sup>Reaction conditions: a stainless reactor of 15 mL, 0.2 g catalyst, 1 mmol EL. <sup>b</sup>Conversion and GVL yield were determined by GC. <sup>c</sup>The other products were mainly isopropyl levulinate by transesterification with minute by-products from aldol condensation between EL and in-situ generated acetone in entries 1-5.

**Table S3.** The contents of various elements on the surface of Zr-CA determined by XPS examination.

| Element | Content of various elements on the surface (Atomic%) <sup>a</sup> |             |
|---------|-------------------------------------------------------------------|-------------|
|         | Fresh Zr-CA                                                       | Spent Zr-CA |
| Zr      | 9.56                                                              | 9.4         |
| N       | 1.12                                                              | 0.93        |
| C       | 54.36                                                             | 54.22       |
| O       | 34.96                                                             | 35.45       |
